# Supplementary material for: A Wide and Specific Spectrum of Genetic Variants and Genotype–Phenotype Correlations Revealed by Next‐Generation Sequencing in Patients with Left Ventricular Noncompaction
Source: PubMed Central journal article supplement — J Am Heart Assoc. 2017 Aug 30;6(9):e006210. doi: 10.1161/JAHA.117.006210 (PMC5634278; doi:10.1161/jaha.117.006210), 2017-08-30
Supplement: JAH3-6-e006210-s001.pdf [file JAH3-6-e006210-s001.pdf]

# **SUPPLEMENTAL MATERIAL**

## **Appendix**

### **LVNC Study Collaborators**

Akiko Komori, Arata Sashinami, Atsuko Ishihara, Atsushi Kuwahara, Chisato Akita, Dai Miura, Daichi Fukumi, Etsuko Tsuda, Eizo Akagawa, Heima Sakaguchi, Hideaki Ueda, Hidenori Iwasaki, Hideshi Tomita, Hiroaki Kise, Hirohiko Shiraishi, Hirohumi Tomimatsu, Hirokazu Taniguchi, Hiroki Kajino, Hiroki Nagamine, Hiromi Katayama, Hiromichi Hamada, Hiroo Ooki, Hiroshi Mito, Hiroshi Miura, Hiroshi Ono, Hirotaka Ooki, Hiroyuki Yoshizawa, Hitoshi Horigome, Hitoshi Tonegawa, Joji Hayashi, Jun Matsushita, Jun Yanai, Jun Yoshimoto, Junichi Ohata, Junichi Takagi, Junichi Yoshikawa, Kazuhiro Takahashi, Kazuki Kouno, Kazuo Eguchi, Keitaro Arima, Kenji Kuroe, Kenji Yasuda, Kenzo Aoki, Kiyotaka Takefuta, Koichi Nihei, Kotaro Inaguma, Kotaro Oyama, Kouichi Nihei, Maki Osaki, Makoto Nakazawa, Makoto Shinohara, Masahiro Kamada, Masahiro Kojo, Masahumi Seguchi, Masaki Arai, Masaki Nakagawa, Masaki Tsukashita, Masaki Yamamoto, Masako Harada, Masato Kimura, Mio Sugiyama, Mitsuhiro Fujino, Mitsuo Takeda, Mitsuya Kudo, Motoyoshi Kawataki, Muneo Yoshibayashi, Naoyuki Shiraishi, Naoyuki Shirovani, Noboru Inamura, Nobuo Momoi, Norihide Fukushima, Norio Sakai, Noriyuki Haneda, Osamu Hirose, Osamu Matsuo, Reizo Baba, Sadataka Kawachi, Satoshi Hasegawa, Satoshi Takenaka, Satoshi Yasukochi, Sawako Kido, Seiichi Sato, Shigeyuki Echigo, Shingo Sakamoto, Shinichi Tsubata, Shinji Nakamura, Shio Suzuki, Shiro Ishikawa, Shunji Kurotobi, Shunji Miyake, Susumu Urata, Tadaaki Abe, Tadaro Abe, Tadashi Sakano, Taichi Kato, Takahiro Shindo, Takako Toda, Takamichi Ishikawa, Takamichi Uchiyama, Takaomi

Minami, Takashi Higaki, Takashi Honda, Takashi Kumamoto, Takashi Urashima, Takehiko Ishida, Takeo Mukai, Takeshi Isobe, Takeshi Kondo, Tamaki Hayashi, Taro Matsuoka, Tasuku Doi, Teiji Akagi, Tohru Matsushita, Tomoaki Murakami, Tomotaka Nakayama, Tomoyasu Ozaki, Tohru Hioka, Tohru Matsushita, Tohru Tsuji, Toshie Kadono, Toshihiro Mitomori, Yasuhiko Tanaka, Yasuhiro Morikami, Yasunobu Hayabuchi, Yasunobu Wakabayashi, Yasuo Murakami, Yasuo Ono, Yo Arita, Yoko Okada, Yoshimi Hiraumi, Yosuke Haneda, Yuichi Nomura, Yuko Kittaka, Yumiko Ikemoto, Yuriko Abe, Yusuke Seino, Yutaka Fukuda, Yutaka Odanaka.

**Table S1. List of 73 analyzed genes of NGS.**

| Gene    | Chromosome    | NCBI<br>Reference<br>Sequence: | Sequence: (Start.End)                         |                                                                                             |
|---------|---------------|--------------------------------|-----------------------------------------------|---------------------------------------------------------------------------------------------|
| ABCC9   | 12p12.1       | NG_012819.1                    | NC_000012.11 (21950323..22094797, complement) | <a href="http://www.ncbi.nlm.nih.gov/gene/10060">http://www.ncbi.nlm.nih.gov/gene/10060</a> |
| ACTC1   | 15q14         | NG_007553.1                    | NC_000015.9 (35080297..35087927, complement)  | <a href="http://www.ncbi.nlm.nih.gov/gene/70">http://www.ncbi.nlm.nih.gov/gene/70</a>       |
| ACTN2   | 1q42-q43      | NG_009081.1                    | NC_000001.10 (236849754..236927931)           | <a href="http://www.ncbi.nlm.nih.gov/gene/88">http://www.ncbi.nlm.nih.gov/gene/88</a>       |
| AKAP9   | 7q21-q22      | NG_011623.1                    | NC_000007.13 (91570181..91739987)             | <a href="http://www.ncbi.nlm.nih.gov/gene/10142">http://www.ncbi.nlm.nih.gov/gene/10142</a> |
| ANK2    | 4q25-q27      | NG_009006.2                    | NC_000004.11 (113739239..114304896)           | <a href="http://www.ncbi.nlm.nih.gov/gene/287">http://www.ncbi.nlm.nih.gov/gene/287</a>     |
| BAG3    | 10q25.2-q26.2 | NG_016125.1                    | NC_000010.10 (121410859..121437331)           | <a href="http://www.ncbi.nlm.nih.gov/gene/9531">http://www.ncbi.nlm.nih.gov/gene/9531</a>   |
| BMPR1A  | 10q22.3       | NG_009362.1                    | NC_000010.10 (88516396..88684945)             | <a href="http://www.ncbi.nlm.nih.gov/gene/657">http://www.ncbi.nlm.nih.gov/gene/657</a>     |
| CACNA1C | 12p13.3       | NG_008801.2                    | NC_000012.11 (2079952..2807115)               | <a href="http://www.ncbi.nlm.nih.gov/gene/775">http://www.ncbi.nlm.nih.gov/gene/775</a>     |
| CACNB2  | 10p12         | NG_016195.1                    | NC_000010.10 (18429373..18830688)             | <a href="http://www.ncbi.nlm.nih.gov/gene/783">http://www.ncbi.nlm.nih.gov/gene/783</a>     |

|        |               |             |                                                 |                                                                                               |
|--------|---------------|-------------|-------------------------------------------------|-----------------------------------------------------------------------------------------------|
| CALR3  | 19p13.11      | NG_031959.2 | NC_000019.9 (16589767..16607015, complement)    | <a href="http://www.ncbi.nlm.nih.gov/gene/125972">http://www.ncbi.nlm.nih.gov/gene/125972</a> |
| CAPN3  | 15q15.1       | NG_008660.1 | NC_000015.9 (42646545..42704515)                | <a href="http://www.ncbi.nlm.nih.gov/gene/825">http://www.ncbi.nlm.nih.gov/gene/825</a>       |
| CAV3   | 3p25          | NG_008797.2 | NC_000003.11 (8775486..8788451)                 | <a href="http://www.ncbi.nlm.nih.gov/gene/859">http://www.ncbi.nlm.nih.gov/gene/859</a>       |
| COL4A1 | 13q34         | NG_011544.1 | NC_000013.10 (110801310..110959496, complement) | <a href="http://www.ncbi.nlm.nih.gov/gene/1282">http://www.ncbi.nlm.nih.gov/gene/1282</a>     |
| DES    | 2q35          | NG_008043.1 | NC_000002.11 (220283099..220291461)             | <a href="http://www.ncbi.nlm.nih.gov/gene/1674">http://www.ncbi.nlm.nih.gov/gene/1674</a>     |
| DMD    | Xp21.2        | NG_012232.1 | NC_000023.10 (31137345..33357726, complement)   | <a href="http://www.ncbi.nlm.nih.gov/gene/1756">http://www.ncbi.nlm.nih.gov/gene/1756</a>     |
| DSC2   | 18q12.1       | NG_008208.1 | NC_000018.9 (28645938..28682388, complement)    | <a href="http://www.ncbi.nlm.nih.gov/gene/1824">http://www.ncbi.nlm.nih.gov/gene/1824</a>     |
| DSG2   | 18q12.1       | NG_007072.3 | NC_000018.9 (29078027..29128814)                | <a href="http://www.ncbi.nlm.nih.gov/gene/1829">http://www.ncbi.nlm.nih.gov/gene/1829</a>     |
| DSP    | 6p24          | NG_008803.1 | NC_000006.11 (7541808..7586946)                 | <a href="http://www.ncbi.nlm.nih.gov/gene/1832">http://www.ncbi.nlm.nih.gov/gene/1832</a>     |
| ELN    | 7q11.23       | NG_009261.1 | NC_000007.13 (73442119..73484237)               | <a href="http://www.ncbi.nlm.nih.gov/gene/2006">http://www.ncbi.nlm.nih.gov/gene/2006</a>     |
| EMD    | Xq28          | NG_008677.1 | NC_000023.10 (153607597..153609883)             | <a href="http://www.ncbi.nlm.nih.gov/gene/2010">http://www.ncbi.nlm.nih.gov/gene/2010</a>     |
| GAA    | 17q25.2-q25.3 | NG_009822.1 | NC_000017.10 (78075339..78093680)               | <a href="http://www.ncbi.nlm.nih.gov/gene/2548">http://www.ncbi.nlm.nih.gov/gene/2548</a>     |

|       |            |             |                                                 |                                                                                             |
|-------|------------|-------------|-------------------------------------------------|---------------------------------------------------------------------------------------------|
| GATA4 | 8p23.1-p22 | NG_008177.1 | NC_000008.10 (11534433..11617510)               | <a href="http://www.ncbi.nlm.nih.gov/gene/2626">http://www.ncbi.nlm.nih.gov/gene/2626</a>   |
| GLA   | Xq22       | NG_007119.1 | NC_000023.10 (100652779..100663001, complement) | <a href="http://www.ncbi.nlm.nih.gov/gene/2717">http://www.ncbi.nlm.nih.gov/gene/2717</a>   |
| GPD1L | 3p22.3     | NG_023375.1 | NC_000003.11 (32148003..32210207)               | <a href="http://www.ncbi.nlm.nih.gov/gene/23171">http://www.ncbi.nlm.nih.gov/gene/23171</a> |
| HCN4  | 15q24.1    | NG_009063.1 | NC_000015.9 (73612200..73661605, complement)    | <a href="http://www.ncbi.nlm.nih.gov/gene/10021">http://www.ncbi.nlm.nih.gov/gene/10021</a> |
| JUP   | 17q21      | NG_009090.2 | NC_000017.10 (39910859..39942964, complement)   | <a href="http://www.ncbi.nlm.nih.gov/gene/3728">http://www.ncbi.nlm.nih.gov/gene/3728</a>   |
| KCNE1 | 21q22.12   | NG_009091.1 | NC_000021.8 (35790910..35884573, complement)    | <a href="http://www.ncbi.nlm.nih.gov/gene/3753">http://www.ncbi.nlm.nih.gov/gene/3753</a>   |
| KCNE2 | 21q22.12   | NG_008804.1 | NC_000021.8 (35736323..35743440)                | <a href="http://www.ncbi.nlm.nih.gov/gene/9992">http://www.ncbi.nlm.nih.gov/gene/9992</a>   |
| KCNE3 | 11q13.4    | NG_011833.1 | NC_000011.9 (74165886..74178600, complement)    | <a href="http://www.ncbi.nlm.nih.gov/gene/10008">http://www.ncbi.nlm.nih.gov/gene/10008</a> |
| KCNH2 | 7q36.1     | NG_008916.1 | NC_000007.13 (150642044..150675402, complement) | <a href="http://www.ncbi.nlm.nih.gov/gene/3757">http://www.ncbi.nlm.nih.gov/gene/3757</a>   |
| KCNJ2 | 17q24.3    | NG_008798.1 | NC_000017.10 (68164757..68176189)               | <a href="http://www.ncbi.nlm.nih.gov/gene/3759">http://www.ncbi.nlm.nih.gov/gene/3759</a>   |
| KCNQ1 | 11p15.5    | NG_008935.1 | NC_000011.9 (2466221..2870340)                  | <a href="http://www.ncbi.nlm.nih.gov/gene/3784">http://www.ncbi.nlm.nih.gov/gene/3784</a>   |

|        |               |             |                                                 |                                                                                             |
|--------|---------------|-------------|-------------------------------------------------|---------------------------------------------------------------------------------------------|
| KRAS   | 12p12.1       | NG_007524.1 | NC_000012.11 (25358180..25403870, complement)   | <a href="http://www.ncbi.nlm.nih.gov/gene/3845">http://www.ncbi.nlm.nih.gov/gene/3845</a>   |
| LAMP2  | Xq24          | NG_007995.1 | NC_000023.10 (119560003..119603204, complement) | <a href="http://www.ncbi.nlm.nih.gov/gene/3920">http://www.ncbi.nlm.nih.gov/gene/3920</a>   |
| LDB3   | 10q22.3-q23.2 | NG_008876.1 | NC_000010.10 (88426542..88495829)               | <a href="http://www.ncbi.nlm.nih.gov/gene/11155">http://www.ncbi.nlm.nih.gov/gene/11155</a> |
| LMNA   | 1q22          | NG_008692.2 | NC_000001.10 (156052369..156109880)             | <a href="http://www.ncbi.nlm.nih.gov/gene/4000">http://www.ncbi.nlm.nih.gov/gene/4000</a>   |
| MYBPC3 | 11p11.2       | NG_007667.1 | NC_000011.9 (47352957..47374253, complement)    | <a href="http://www.ncbi.nlm.nih.gov/gene/4607">http://www.ncbi.nlm.nih.gov/gene/4607</a>   |
| MYH11  | 16p13.11      | NG_009299.1 | NC_000016.9 (15796992..15950887, complement)    | <a href="http://www.ncbi.nlm.nih.gov/gene/4629">http://www.ncbi.nlm.nih.gov/gene/4629</a>   |
| MYH6   | 14q12         | NG_023444.1 | NC_000014.8 (23849942..23878836, complement)    | <a href="http://www.ncbi.nlm.nih.gov/gene/4624">http://www.ncbi.nlm.nih.gov/gene/4624</a>   |
| MYH7   | 14q12         | NG_007884.1 | NC_000014.8 (23881947..23904870, complement)    | <a href="http://www.ncbi.nlm.nih.gov/gene/4625">http://www.ncbi.nlm.nih.gov/gene/4625</a>   |
| MYL2   | 12q24.11      | NG_007554.1 | NC_000012.11 (111348623..111358404, complement) | <a href="http://www.ncbi.nlm.nih.gov/gene/4633">http://www.ncbi.nlm.nih.gov/gene/4633</a>   |
| MYL3   | 3p21.3-p21.2  | NG_007555.2 | NC_000003.11 (46899357..46904973, complement)   | <a href="http://www.ncbi.nlm.nih.gov/gene/4634">http://www.ncbi.nlm.nih.gov/gene/4634</a>   |

|        |          |             |                                                 |                                                                                             |
|--------|----------|-------------|-------------------------------------------------|---------------------------------------------------------------------------------------------|
| MYLK   | 3q21     | NG_029111.1 | NC_000003.11 (123331143..123603149, complement) | <a href="http://www.ncbi.nlm.nih.gov/gene/4638">http://www.ncbi.nlm.nih.gov/gene/4638</a>   |
| MYOZ2  | 4q26-q27 | NG_029747.1 | NC_000004.11 (120056939..120108944)             | <a href="http://www.ncbi.nlm.nih.gov/gene/51778">http://www.ncbi.nlm.nih.gov/gene/51778</a> |
| NKX2-5 | 5q34     | NG_013340.1 | NC_000005.9 (172659107..172662315, complement)  | <a href="http://www.ncbi.nlm.nih.gov/gene/1482">http://www.ncbi.nlm.nih.gov/gene/1482</a>   |
| NRAS   | 1p13.2   | NG_007572.1 | NC_000001.10 (115247085..115259515, complement) | <a href="http://www.ncbi.nlm.nih.gov/gene/4893">http://www.ncbi.nlm.nih.gov/gene/4893</a>   |
| PKP2   | 12p11    | NG_009000.1 | NC_000012.11 (32943680..33049780, complement)   | <a href="http://www.ncbi.nlm.nih.gov/gene/5318">http://www.ncbi.nlm.nih.gov/gene/5318</a>   |
| PLN    | 6q22.1   | NG_009082.1 | NC_000006.11 (118869442..118881587)             | <a href="http://www.ncbi.nlm.nih.gov/gene/5350">http://www.ncbi.nlm.nih.gov/gene/5350</a>   |
| PRKAG2 | 7q36.1   | NG_007486.1 | NC_000007.13 (151253200..151574316, complement) | <a href="http://www.ncbi.nlm.nih.gov/gene/51422">http://www.ncbi.nlm.nih.gov/gene/51422</a> |
| PTPN11 | 12q24    | NG_007459.1 | NC_000012.11 (112856536..112947717)             | <a href="http://www.ncbi.nlm.nih.gov/gene/5781">http://www.ncbi.nlm.nih.gov/gene/5781</a>   |
| RAF1   | 3p25     | NG_007467.1 | NC_000003.11 (12625100..12705700, complement)   | <a href="http://www.ncbi.nlm.nih.gov/gene/5894">http://www.ncbi.nlm.nih.gov/gene/5894</a>   |
| RPS7   | 2p25     | NG_011744.1 | NC_000002.11 (3622853..3628509)                 | <a href="http://www.ncbi.nlm.nih.gov/gene/6201">http://www.ncbi.nlm.nih.gov/gene/6201</a>   |



|         |           |             |                                                |                                                                                             |
|---------|-----------|-------------|------------------------------------------------|---------------------------------------------------------------------------------------------|
| RYR2    | 1q43      | NG_008799.2 | NC_000001.10 (237205510..237997288)            | <a href="http://www.ncbi.nlm.nih.gov/gene/6262">http://www.ncbi.nlm.nih.gov/gene/6262</a>   |
| SCN1B   | 9q13.1    | NG_013359.1 | NC_000019.9 (35521555..35531353)               | <a href="http://www.ncbi.nlm.nih.gov/gene/6324">http://www.ncbi.nlm.nih.gov/gene/6324</a>   |
| SCN3B   | 11q23.3   | NG_016283.1 | NC_000011.9 (123499895..123525315, complement) | <a href="http://www.ncbi.nlm.nih.gov/gene/55800">http://www.ncbi.nlm.nih.gov/gene/55800</a> |
| SCN4B   | 11q23.3   | NG_011710.1 | NC_000011.9 (118004092..118023630, complement) | <a href="http://www.ncbi.nlm.nih.gov/gene/6330">http://www.ncbi.nlm.nih.gov/gene/6330</a>   |
| SCN5A   | 3p21      | NG_008934.1 | NC_000003.11 (38589553..38691164, complement)  | <a href="http://www.ncbi.nlm.nih.gov/gene/6331">http://www.ncbi.nlm.nih.gov/gene/6331</a>   |
| SGCD    | 5q33-q34  | NG_008693.2 | NC_000005.9 (155462147..156194799)             | <a href="http://www.ncbi.nlm.nih.gov/gene/6444">http://www.ncbi.nlm.nih.gov/gene/6444</a>   |
| SLC25A4 | 4q35      | NG_013001.1 | NC_000004.11 (186064417..186071538)            | <a href="http://www.ncbi.nlm.nih.gov/gene/291">http://www.ncbi.nlm.nih.gov/gene/291</a>     |
| SMAD3   | 15q22.33  | NG_011990.1 | NC_000015.9 (67358036..67487533)               | <a href="http://www.ncbi.nlm.nih.gov/gene/4088">http://www.ncbi.nlm.nih.gov/gene/4088</a>   |
| SNTA1   | 20q11.2   | NG_011622.1 | NC_000020.10 (31995763..32031698, complement)  | <a href="http://www.ncbi.nlm.nih.gov/gene/6640">http://www.ncbi.nlm.nih.gov/gene/6640</a>   |
| SOS1    | 2p21      | NG_007530.1 | NC_000002.11 (39208690..39347686, complement)  | <a href="http://www.ncbi.nlm.nih.gov/gene/6654">http://www.ncbi.nlm.nih.gov/gene/6654</a>   |
| STARD3  | 17q11-q12 |             | NC_000017.10 (37793333..37820454)              | <a href="http://www.ncbi.nlm.nih.gov/gene/10948">http://www.ncbi.nlm.nih.gov/gene/10948</a> |
| TAZ     | Xq28      | NG_009634.1 | NC_000023.10 (153639877..153650065)            | <a href="http://www.ncbi.nlm.nih.gov/gene/6901">http://www.ncbi.nlm.nih.gov/gene/6901</a>   |

|        |         |             |                                                 |                                                                                             |
|--------|---------|-------------|-------------------------------------------------|---------------------------------------------------------------------------------------------|
| TBX5   | 12q24.1 | NG_007373.1 | NC_000012.11 (114791735..114846247, complement) | <a href="http://www.ncbi.nlm.nih.gov/gene/6910">http://www.ncbi.nlm.nih.gov/gene/6910</a>   |
| TGFBR1 | 9q22    | NG_007461.1 | NC_000009.11 (101867412..101916474)             | <a href="http://www.ncbi.nlm.nih.gov/gene/7046">http://www.ncbi.nlm.nih.gov/gene/7046</a>   |
| TGFBR2 | 3p22    | NG_007490.1 | NC_000003.11 (30647994..30735634)               | <a href="http://www.ncbi.nlm.nih.gov/gene/7048">http://www.ncbi.nlm.nih.gov/gene/7048</a>   |
| TMEM43 | 3p25.1  | NG_008975.1 | NC_000003.11 (14166440..14185180)               | <a href="http://www.ncbi.nlm.nih.gov/gene/79188">http://www.ncbi.nlm.nih.gov/gene/79188</a> |
| TNNC1  | 3p21.1  | NG_008963.1 | NC_000003.11 (52485107..52488057, complement)   | <a href="http://www.ncbi.nlm.nih.gov/gene/7134">http://www.ncbi.nlm.nih.gov/gene/7134</a>   |
| TNNI3  | 19q13.4 | NG_007866.2 | NC_000019.9 (55663135..55669100, complement)    | <a href="http://www.ncbi.nlm.nih.gov/gene/7137">http://www.ncbi.nlm.nih.gov/gene/7137</a>   |
| TNNT2  | 1q32    | NG_007556.1 | NC_000001.10 (201328136..201346836, complement) | <a href="http://www.ncbi.nlm.nih.gov/gene/7139">http://www.ncbi.nlm.nih.gov/gene/7139</a>   |
| TPM1   | 15q22.1 | NG_007557.1 | NC_000015.9 (63334838..63364114)                | <a href="http://www.ncbi.nlm.nih.gov/gene/7168">http://www.ncbi.nlm.nih.gov/gene/7168</a>   |
| VCL    | 10q22.2 | NG_008868.1 | NC_000010.10 (75757836..75879918)               | <a href="http://www.ncbi.nlm.nih.gov/gene/7414">http://www.ncbi.nlm.nih.gov/gene/7414</a>   |

**Table S2. Silico predictive algorithms used in the study.**

| Category            | Basis                                                    | Name            | Website                                                                                 | Prediction Threshold                                              |
|---------------------|----------------------------------------------------------|-----------------|-----------------------------------------------------------------------------------------|-------------------------------------------------------------------|
| Missense prediction | Evolutionary conservation                                | FATHMM          | <a href="http://fathmm.biocompute.org.uk">http://fathmm.biocompute.org.uk</a>           | <-1.5 Damaging<br>>-1.5 Tolerated                                 |
|                     |                                                          | SIFT            | <a href="http://sift.jcvi.org">http://sift.jcvi.org</a>                                 | <0.05 Deleterious<br>>0.05 Tolerated                              |
| Missense prediction | Protein structure/function and evolutionary conservation | Align GVGD      | <a href="http://agvgd.iarc.fr/agvgd_input.php">http://agvgd.iarc.fr/agvgd_input.php</a> | $\cong$ C15 Probably Damaging                                     |
|                     |                                                          | Mutation Taster | <a href="http://www.mutationtaster.org">http://www.mutationtaster.org</a>               | Disease causing                                                   |
|                     |                                                          | Polyphen-2      | <a href="http://genetics.bwh.harvard.edu/pph2">http://genetics.bwh.harvard.edu/pph2</a> | $\cong$ 0.432 Possibly Damaging<br>$\cong$ 0.85 Probably Damaging |

|                                             |                                                                                               |         |                                                                                   |                                                                    |
|---------------------------------------------|-----------------------------------------------------------------------------------------------|---------|-----------------------------------------------------------------------------------|--------------------------------------------------------------------|
| Missense and insertion/deletions prediction | Alignment and measurement of similarity between variant sequence and protein sequence homolog | PROVEAN | <a href="http://provean.jcvi.org/index.php">http://provean.jcvi.org/index.php</a> | <-2.5 Deleterious<br>>-2.5 Neutral                                 |
| Missense and insertion/deletions prediction | Contrasts annotations of fixed/nearly fixed derived alleles in humans with simulated variants | CADD    | <a href="http://cadd.gs.washington.edu">http://cadd.gs.washington.edu</a>         | $\cong 20$ 1% most deleterious<br>$\cong 30$ 0.1% most deleterious |

#### Reference

1. Richards S, Aziz N, Bale S, Bick D, Das S, Gastier-Foster J, Grody WW, Hegde M, Lyon E, Spector E, Voelkerding K, Rehm HL. Standards and guidelines for the interpretation of sequence variants: a joint consensus recommendation of the American College of Medical Genetics and Genomics and the association for molecular autopsy. *Genet Med* 2015; 17:405–423.

**Table S3. Frequency of MYH7 and MYBPC3 in LVNC, HCM and DCM patients.**

| Gene   | % Frequency of mutations in LVNC patients in this study (n=102) | % Frequency of mutations in HCM in Japanese cohort* (n=127) | % Frequency of mutations in HCM in French cohort† (n=172) | % Frequency of mutations in HCM in US cohort study‡ (n=389) | % Frequency of mutations in DCM in Finnish cohort study§ (n=145) |
|--------|-----------------------------------------------------------------|-------------------------------------------------------------|-----------------------------------------------------------|-------------------------------------------------------------|------------------------------------------------------------------|
| MYH7   | 19.6                                                            | 24.4                                                        | 26.2                                                      | 15.2                                                        | 0.7                                                              |
| MYBPC3 | 0.98                                                            | 15                                                          | 26.2                                                      | 18                                                          | 0                                                                |

\* *Heart Vessels*. (2016). doi:10.1007/s00380-016-0920-0. † *Circulation* 2003; 107: 2227–2232. ‡ *J Am Coll Cardiol* 2004; 44: 1903–1910.

§ *Eur Heart J*. 2015;36(34):2327-2337.

**Table S4. Novel mutations, absent in Exome Aggregation Consortium and Human Genetic Variation Database (HGVD).**

| Gene | variant | Prediction   |             |                   |       |                 |              |      |
|------|---------|--------------|-------------|-------------------|-------|-----------------|--------------|------|
|      |         | FATHMM       | SIFT        | Polyphen2         | Align | Mutation Taster | Provean      | CADD |
| GVGD |         |              |             |                   |       |                 |              |      |
| MYH7 | R941C   | Damaging     | Deleterious | Probably Damaging | C65   | Disease causing | Deleterious  | 34   |
|      |         | Score: -2.13 | Score:0     | Score:1           |       |                 | Score: -6.13 |      |
|      | Q315R   | Damaging     | Deleterious | Possibly Damaging | C0    | Disease causing | Deleterious  | 23.8 |
|      |         | Score: -2.33 | Score:0.011 | Score:0.51        |       |                 | Score: -3.16 |      |
|      | F230S   | Damaging     | Deleterious | Probably Damaging | C0    | Disease causing | Deleterious  | 27.7 |
|      |         | Score: -4.96 | Score:0     | Score:0.984       |       |                 | Score: -6.07 |      |
|      | K542N   | Damaging     | Deleterious | Probably Damaging | C65   | Disease causing | Deleterious  | 31   |
|      |         | Score: -2.47 | Score:0     | Score:1           |       |                 | Score: -4.4  |      |

|       |               |             |                   |     |                 |              |      |
|-------|---------------|-------------|-------------------|-----|-----------------|--------------|------|
| A223V | Damaging      | Deleterious | Probably Damaging | C0  | Disease causing | Deleterious  | 25.1 |
|       | Score: -3.17  | Score:0.08  | Score:0.854       |     |                 | Score: -2.75 |      |
| M362R | Damaging      | Deleterious | Benign            | C0  | Disease causing | Deleterious  | 26.9 |
|       | Score: -3.64  | Score:0     | Score:0.001       |     |                 | Score: -5.15 |      |
| K542T | Damaging      | Deleterious | Possibly Damaging | C65 | Disease causing | Deleterious  | 27.4 |
|       | Score: -2.48  | Score:0     | Score:0.517       |     |                 | Score: -4.4  |      |
| E667V | Damaging      | Tolerated   | Probably Damaging | C65 | Disease causing | Deleterious  | 26.1 |
|       | Score: --2.46 | Score:0.113 | Score:0.994       |     |                 | Score: -5.14 |      |
| E448K | Damaging      | Deleterious | Possibly Damaging | C0  | Disease causing | Deleterious  | 32   |
|       | Score: -2.22  | Score:0.002 | Score:0.798       |     |                 | Score: -2.61 |      |
| L693R | Damaging      | Deleterious | Probably Damaging | C65 | Disease causing | Deleterious  | 28.3 |
|       | Score: -4.85  | Score:0     | Score:0.997       |     |                 | Score: -5.29 |      |
| R712H | Damaging      | Deleterious | Probably Damaging | C25 | Disease causing | Deleterious  | 35   |

---

|       |             |              |             |                   |     |                 |              |       |
|-------|-------------|--------------|-------------|-------------------|-----|-----------------|--------------|-------|
|       |             | Score: -4.54 | Score:0     | Score:0.988       |     |                 | Score: -4.35 |       |
|       | c.896-1 G>A | NA           | NA          | NA                | NA  | NA              | NA           | 24.9  |
| TAZ   | Q159P       | Damaging     | Deleterious | Probably Damaging | C0  | Disease causing | Deleterious  | 23.4  |
|       |             | Score: -4.39 | Score:0.001 | Score:0.993       |     |                 | Score: -5.73 |       |
|       | M185V       | Damaging     | Deleterious | Probably Damaging | C0  | Disease causing | NA           | 26.6  |
|       |             | Score: -3.16 | Score:0.03  | Score:0.932       |     |                 |              |       |
|       | L169F       | Damaging     | Deleterious | Probably Damaging | C0  | Disease causing | Deleterious  | 31    |
|       |             | Score: -4.78 | Score:0.01  | Score:0.886       |     |                 | Score: -3.33 |       |
|       | H176Y       | Damaging     | Deleterious | Probably Damaging | C0  | Disease causing | NA           | 16.57 |
|       |             | Score: -3.15 | Score:0     | Score:0.999       |     |                 |              |       |
| ACTC1 | T231R       | Damaging     | NA          | Probably Damaging | C65 | Disease causing | Deleterious  | 24.9  |
|       |             | Score: -4.39 |             | Score:0.908       |     |                 | Score: -2.65 |       |
|       | Y93H        | Damaging     | NA          | Possibly Damaging | C65 | Disease causing | Deleterious  | 24    |



|        |       |               |             |                   |     |                 |              |      |
|--------|-------|---------------|-------------|-------------------|-----|-----------------|--------------|------|
|        |       | Score: - 3.43 |             | Score:0.531       |     |                 | Score: -3.59 |      |
| TPM1   | R238Q | Damaging      | Deleterious | Probably Damaging | C35 | Disease causing | Deleterious  | 35   |
|        |       | Score: -6.36  | Score:0.001 | Score:0.999       |     |                 | Score: -3.22 |      |
|        | D14G  | Damaging      | Deleterious | Probably Damaging | C0  | Disease causing | Deleterious  | 29.9 |
|        |       | Score: -2.38  | Score:0.001 | Score:1           |     |                 | Score: -3.21 |      |
| MYL2   | E88K  | Tolerated     | Deleterious | Probably Damaging | C15 | Disease causing | Deleterious  | 34   |
|        |       | Score: -1.15  | Score:0.017 | Score:0.995       |     |                 | Score: -3.62 |      |
| TNNC1  | E94A  | Damaging      | Deleterious | Benign            | C65 | Disease causing | Deleterious  | 24.2 |
|        |       | Score: -3.74  | Score:0     | Score:0.012       |     |                 | Score: -5.36 |      |
| MYBPC3 | G758D | Tolerated     | Deleterious | Probably Damaging | C65 | Disease causing | Deleterious  | 32   |
|        |       | Score: -1.64  | Score:0.001 | Score:0.926       |     |                 | Score: -5.96 |      |
| LMNA   | A244V | Damaging      | Deleterious | Probably Damaging | C65 | Disease causing | Deleterious  | 34   |
|        |       | Score: -2.5   | Score:0.001 | Score:1           |     |                 | Score: -3.76 |      |

|                   |              |              |             |                   |     |                 |              |      |
|-------------------|--------------|--------------|-------------|-------------------|-----|-----------------|--------------|------|
| SGCD              | N99H*        | Damaging     | Deleterious | Possibly Damaging | C0  | Disease causing | Neutral      | 23.4 |
|                   |              | Score: -3.45 | Score:0.05  | Score:0.744       |     |                 | Score: -0.69 |      |
| BMPR1A            | R284L        | Damaging     | Deleterious | Probably Damaging | C65 | Disease causing | Deleterious  | 35   |
|                   |              | Score: -3.32 | Score:0     | Score:0.988       |     |                 | Score: -6.74 |      |
| HCN4              | G480S        | Damaging     | Deleterious | Probably Damaging | C55 | Disease causing | Deleterious  | 25.9 |
|                   |              | Score: -7.52 | Score:0.024 | Score:1           |     |                 | Score: -5.74 |      |
| TBX5 <sup>†</sup> | p. Arg279Ter | NA           | NA          | NA                | C25 | Disease causing | NA           | 40   |

The classification of novel variants is all likely pathogenic except TBX5 p. Arg279Ter. \* Two patients have this variant. † Nonsense mutation and classification is pathogenic.

**Table S5. Gene collapsing test of rare variants.**

| Rank | Gene    | Frequency  |               | Qualifying | Frequency  |              | Fisher's |
|------|---------|------------|---------------|------------|------------|--------------|----------|
|      |         | Qualifying | Qualifying    | Controls   | Qualifying | Exact        |          |
|      |         | Cases      | Cases (N=102) | Cases      | Controls   | Test p-value |          |
|      |         |            |               |            | (N=4327)   |              |          |
| 1    | MYH7    | 19         | 0.1862        | 41         | 0.0095     | 1.29 E-17    |          |
| 2    | TAZ     | 6          | 0.0588        | 2          | 0.0005     | 3.48 E-9     |          |
| 3    | MYL2    | 2          | 0.0196        | 5          | 0.0012     | 0.01         |          |
| 4    | ACTC1   | 2          | 0.0196        | 2          | 0.0005     | 0.003        |          |
| 5    | TPM1    | 2          | 0.0196        | 2          | 0.0005     | 0.003        |          |
| 6    | SGCD    | 2          | 0.0196        | 5          | 0.0012     | 0.01         |          |
| 7    | ANK2    | 1          | 0.0098        | 4          | 0.0009     | 0.251        |          |
| 8    | TNNC1   | 1          | 0.0098        | 5          | 0.0012     | 0.131        |          |
| 9    | BMPRI1A | 1          | 0.0098        | 5          | 0.0012     | 0.131        |          |
| 10   | KCNE3   | 1          | 0.0098        | 6          | 0.0014     | 0.151        |          |
| 11   | TBX5    | 1          | 0.0098        | 7          | 0.0016     | 0.170        |          |
| 12   | HCN4    | 1          | 0.0098        | 8          | 0.0018     | 0.193        |          |
| 13   | LMNA    | 1          | 0.0098        | 9          | 0.0021     | 0.208        |          |
| 14   | KCNH2   | 1          | 0.0098        | 20         | 0.0046     | 0.388        |          |
| 15   | MYBPC3  | 1          | 0.0098        | 35         | 0.0081     | 0.569        |          |
| 16   | JUP     | 1          | 0.0098        | 37         | 0.0086     | 0.589        |          |

**Table S6.** Specific variants found in subjects with systolic dysfunction versus those without dysfunction

| with systolic dysfunction |        |              | without systolic dysfunction |      |         |
|---------------------------|--------|--------------|------------------------------|------|---------|
| ID                        | Gene   | variant      | ID                           | Gene | variant |
| 132                       | MYL2   | E88K         | 250                          | MYH7 | E677V   |
| 133                       | ACTC1  | Y93H         | 298                          | MYH7 | R904C   |
| 143                       | MYH7   | E1801K       | 401                          | HCN4 | G480S   |
| 153                       | MYH7   | E448K        |                              |      |         |
| 159                       | TAZ    | c.109+1G>C   |                              |      |         |
| 233                       | KCNH2  | A561T        |                              |      |         |
| 247                       | MYH7   | R712H        |                              |      |         |
| 260                       | SGCD   | N99H         |                              |      |         |
| 309                       | MYH7   | M362R        |                              |      |         |
| 312                       | ACTC1  | T231R        |                              |      |         |
| 313                       | TAZ    | M185V        |                              |      |         |
| 315                       | MYBPC3 | G758D        |                              |      |         |
| 321                       | TNN1C  | E94A         |                              |      |         |
| 327                       | TAZ    | L169F        |                              |      |         |
| 333                       | MYH7   | A223V        |                              |      |         |
| 341                       | ANK2   | R321W        |                              |      |         |
| 350                       | TPM1   | R238Q        |                              |      |         |
| 361                       | MYH7   | c.896-1 G>A  |                              |      |         |
| 362                       | MYH7   | F230S        |                              |      |         |
| 365                       | MYL2   | P144fs       |                              |      |         |
| 377                       | MYH7   | L693R        |                              |      |         |
| 378                       | MYH7   | L620P        |                              |      |         |
| 386                       | TBX5   | p. Arg279Ter |                              |      |         |

|     |        |        |
|-----|--------|--------|
| 390 | MYH7   | E1914K |
| 391 | MYH7   | E1801K |
| 392 | MYH7   | Q315R  |
| 415 | TAZ    | Q159P  |
| 427 | MYH7   | R941C  |
| 403 | TAZ    | G197R  |
| 404 | MYH7   | R23W   |
| 405 | LMNA   | A244V  |
| 342 | MYH7   | P838L  |
|     | BMPR1A | R284L  |
| 280 | MYH7   | K542N  |
|     | JUP    | E146K  |
| 274 | KCNE3  | R99H   |
|     | TAZ    | H176Y  |
| 339 | ANK2   | W3620R |
|     | MYH7   | K542N  |
| 234 | SGCD   | N99H   |
|     | TPM1   | D14G   |

---

**Table S7.** Details for each subject.

| ID  | Gene  | variant    | Sex<br>(1M 2F) | age on<br>set | Heart<br>failure | family history (0<br>no) | LVEF% | LVDD-Z<br>SCORE | Arrhythmia (0<br>normal) | Prognosis (0:<br>alive)  |
|-----|-------|------------|----------------|---------------|------------------|--------------------------|-------|-----------------|--------------------------|--------------------------|
| 132 | MYL2  | E88K       | 1              | 0.083         | 1                | father DCM               | 39    | 1.2             | 0                        | 0                        |
| 133 | ACTC1 | Y93H       | 2              | 0             | 1                | Mother LVNC              | 36    | 1.88            | 0                        | 0                        |
| 143 | MYH7  | E1801K     | 1              | 0             | 1                | 0                        | 42    | 1               | 0                        | 0                        |
| 153 | MYH7  | E448K      | 2              | 0.083         | 0                | Sister LVNC              | 46    | 0.795           | 0                        | 0                        |
| 159 | TAZ   | c.109+1G>C | 1              | 0.167         | 1                | Mother LVNC              | 20    | 2.888           | 0                        | death                    |
| 233 | KCNH2 | A561T      | 1              | 0             | 1                | 0                        | 31    | 1.1116          | non-specific change      | death                    |
| 247 | MYH7  | R712H      | 2              | 0             | 1                | 0                        | 36    | -0.244          | 0                        | Heart<br>transplantation |

|     |        |       |   |       |   |                            |      |        |                                 |                          |
|-----|--------|-------|---|-------|---|----------------------------|------|--------|---------------------------------|--------------------------|
| 250 | MYH7   | E677V | 1 | 0.04  | 1 | 0                          | 60   | 1.6326 | 0                               | 0                        |
| 260 | SGCD   | N99H  | 1 | 0.083 | 0 | 0                          | 45   | 1.5    | 0                               | 0                        |
| 298 | MYH7   | R904C | 2 | 6     | 0 | 0                          | 65   | 2.1    | 0                               | 0                        |
| 309 | MYH7   | M362R | 2 | 0.01  | 0 | Father and brother<br>LVNC | 39   | 1.08   | 0                               | 0                        |
| 312 | ACTC1  | T231R | 1 | 4     | 1 | 0                          | 49.4 | 1.8727 | Supraventricular<br>tachycardia | ICD                      |
| 313 | TAZ    | M185V | 1 | 0.083 | 1 | Mother LVNC                | 40   | 3.3333 | 0                               | Heart<br>transplantation |
| 315 | MYBPC3 | G758D | 2 | 3     | 0 | 0                          | 38.5 | 1.25   | 0                               | 0                        |
| 321 | TNN1C  | E94A  | 2 | 0.333 | 0 | 0                          | 32.5 | 2.22   | 0                               | Heart<br>transplantation |
| 327 | TAZ    | L169F | 1 | 0     | 1 | brother LVNC               | 22   | 2.566  | 0                               | 0                        |

|     |      |                 |   |        |   |             |      |        |                     |   |
|-----|------|-----------------|---|--------|---|-------------|------|--------|---------------------|---|
| 333 | MYH7 | A223V           | 1 | 0      | 1 | 0           | 10   | -0.4   | 0                   | 0 |
| 339 | MYH7 | K542N           | 2 | 0      | 1 | 0           | 48   | 1      | non-specific change | 0 |
| 341 | ANK2 | R321W           | 2 | 0.083  | 1 | 0           | 46.8 | 1.9166 | non-specific change | 0 |
| 350 | TPM1 | R238Q           | 2 | 0      | 1 | 0           | 38.4 | 1.33   | 0                   | 0 |
| 361 | MYH7 | c.896-1<br>G>A  | 2 | 0      | 1 | 0           | 38   | 0.977  | 0                   | 0 |
| 362 | MYH7 | F230S           | 2 | 0.0833 | 0 | 0           | 40   | -0.823 | 0                   | 0 |
| 365 | MYL2 | P144fs          | 2 | 0.0416 | 1 | 0           | 34   | 1.7391 | 0                   | 0 |
| 377 | MYH7 | L693R           | 2 | 0.0833 | 1 | 0           | 30   | 1.3333 | 0                   | 0 |
| 378 | MYH7 | L620P           | 2 | 0      | 1 | Sister LVNC | 20   | 0.1    | AF                  | 0 |
| 386 | TBX5 | p.<br>Arg279Ter | 1 | 0      | 1 | 0           | 31   | 1.88   | non-specific change | 0 |
| 390 | MYH7 | E1914K          | 1 | 0      | 0 | 0           | 43.5 | 3.3833 | 0                   | 0 |
| 391 | MYH7 | E1801K          | 2 | 0.8333 | 1 | 0           | 38   | 2.6785 | 0                   | 0 |



|     |        |       |   |         |   |             |      |        |                             |       |
|-----|--------|-------|---|---------|---|-------------|------|--------|-----------------------------|-------|
| 392 | MYH7   | Q315R | 1 | 0.0833  | 1 | 0           | 29   | 2.1428 | T wave                      | 0     |
| 415 | TAZ    | Q159P | 1 | 0.8333  | 1 | Sister LVNC | 14   | 2.4    | 0                           | 0     |
| 427 | MYH7   | R941C | 2 | 1.5     | 0 | father DCM  | 44.1 | 1.3709 | 0                           | 0     |
| 401 | HCN4   | G480S | 2 | 0.0166  | 1 | Mother LVNC | 59.4 | -0.833 | 0                           | 0     |
| 403 | TAZ    | G197R | 1 | 0.25    | 1 | 0           | 6    | 4.4523 | 0                           | 0     |
| 404 | MYH7   | R23W  | 2 | 0.08333 | 0 | 0           | 48.9 | 0.0408 | 0                           | 0     |
| 405 | LMNA   | A244V | 2 | 0.08333 | 1 | Sister LVNC | 34   | 1.89   | 0                           | 0     |
| 342 | MYH7   | P838L | 2 | 0       | 1 | 0           | 38   | 1.72   | ventricular<br>fibrillation | death |
| 342 | BMPR1A | R284L |   |         |   |             |      |        |                             |       |
| 280 | MYH7   | K542N | 1 | 0       | 1 | 0           | 40   | 2.16   | 0                           | death |
| 280 | JUP    | E146K |   |         |   |             |      |        |                             |       |
| 274 | KCNE3  | R99H  | 1 | 0.005   | 1 | 0           | 45   | 2.03   | left bundle branch          | death |

|     |      |       |   |   |   |   |    |        |       |       |
|-----|------|-------|---|---|---|---|----|--------|-------|-------|
| 274 | TAZ  | H176Y |   |   |   |   |    |        | block |       |
| 234 | SGCD | N99H  | 1 | 0 | 1 | 0 | 27 | 3.3095 | 0     | death |
| 234 | TPM1 | D14G  |   |   |   |   |    |        |       |       |
